# Supplementary material for: Dynamic implantation – an improved approach for a large area SIMS measurement
Source: Royal Society of Chemistry journal article supplement (doi:10.1039/d2ja00190j), 2023-01-01
Supplement: d2ja00190j3.pdf [file d2ja00190j3.pdf]

Elementary Supplementary Material (ESI) for Journal of Analytical Atomic Spectrometry.  
This journal is © The Royal Society of Chemistry 2023

NanoSIMS 50 - DEFANALYSIS - LINESCAN - Measurement Conditions - Sample\_1.ls

Load... Save Save as... New

Sample ID: Data included: No  
Matrix ID:

Total analysis time: 42mn52s  
X step (microns): 0 Y step (microns): 2  
Number of steps: 110

Lens preset: None  More...  
Silt preset: None  More...  
Pre-sputtering: No Yes

Raster size (µm): 50.0  
Real size (µm): 50.0 Counting size (µm): 50.0  
Comment:

Print results after acquisition

Go Acquisition Analyse Selection

Scanning Mode: No Yes  
Working Frame  
Width: 256 Height: 256  
Scanning frame  
Start Col: 1 Start Row: 1  
Width: 256 Height: 256  
Blanking: No Yes

Working Frame  
256 x 256  
Scanning Frame  
256 x 256

B1 Gauss 1599.999 Cl/pr (µs): 0.52 C/tr (s): 23.069  
Offset (V): 0.00

Centering

| Detector List |          |                |         |        |                          | Peak Num. | Ref. Peak Num.           | Baseline Pd Offset (V) |
|---------------|----------|----------------|---------|--------|--------------------------|-----------|--------------------------|------------------------|
| N             | Id       | Species symbol | A.M.U.  | Radius |                          |           |                          |                        |
| Tr1           | 16O      | 16.118         | 323.111 |        | <input type="checkbox"/> |           | <input type="checkbox"/> |                        |
| Tr2           | 12C2     | 24.113         | 395.205 |        | <input type="checkbox"/> |           | <input type="checkbox"/> |                        |
| Tr3           | 12C 14N  | 25.930         | 409.827 |        | <input type="checkbox"/> |           | <input type="checkbox"/> |                        |
| Tr4           | 12C 15N  | 27.117         | 419.103 |        |                          |           |                          |                        |
| Tr5           | 31P      | 31.081         | 448.692 |        |                          |           |                          |                        |
| Tr6           | 32S      | 31.966         | 455.031 |        |                          |           |                          |                        |
| Det7          | 56Fe 16O | 71.913         | 682.496 |        |                          |           |                          |                        |
