# Supplementary material for: Dynamic implantation – an improved approach for a large area SIMS measurement
Source: Royal Society of Chemistry journal article supplement (doi:10.1039/d2ja00190j), 2023-01-01
Supplement: d2ja00190j4.pdf [file d2ja00190j4.pdf]

# Electronic Supplementary Material (ESI) for Journal of Analytical Atomic Spectrometry.

This journal is © The Royal Society of Chemistry 2023

NanoSIMS 50 - DEFANALYSIS - IMAGE SAMPLE STAGE - Measurement Conditions - Sample\_1.im

Load... Save Save as... New

Sample ID: Data included: No  
Matrix ID:

Total analysis time: 1h2mn CI/pt (s): 3.690

Width: 40 4 Height: 25 4  
Step (µm): 4 3 Physical raster (µm): 156

Scanning Mode: No Yes 1  
Working Frame  
Width: 64 Height: 64  
Scanning frame  
Start Col: 1 Start Row: 1  
Width: 64 Height: 64  
Raster size (µm): 20.0 6  
Real size (µm): 20.0

Working Frame  
64 x 64  
Scanning Frame  
64 x 64

7

Id Gauss  
 B1 1599.999  
CI/px (µs): 0.01 → CI/fr (s): 3.690  
Offset (V): 0.00

Lens preset: None  More...  
SIT preset: None  More...  
Pre-sputtering: No Yes 5

Comment:

Print results after acquisition

Go Acquisition 8 Analyse Selection

| Detector List |      |          |                |         | Peak Num.                | Ref. Peak Num.           | Baseline Pd Offset (V)   |  |
|---------------|------|----------|----------------|---------|--------------------------|--------------------------|--------------------------|--|
| Centering     | N    | Id       | Species symbol | A.M.U.  | Radius                   |                          |                          |  |
|               | Tr1  | 16O      | 16.118         | 323.111 | <input type="checkbox"/> | <input type="checkbox"/> | <input type="checkbox"/> |  |
|               | Tr2  | 12C2     | 24.113         | 395.205 | <input type="checkbox"/> | <input type="checkbox"/> | <input type="checkbox"/> |  |
|               | Tr3  | 12C 14N  | 25.930         | 409.827 | <input type="checkbox"/> | <input type="checkbox"/> | <input type="checkbox"/> |  |
|               | Tr4  | 12C 15N  | 27.117         | 419.103 |                          |                          |                          |  |
|               | Tr5  | 31P      | 31.081         | 448.692 |                          |                          |                          |  |
|               | Tr6  | 32S      | 31.966         | 455.031 |                          |                          |                          |  |
|               | Det7 | 56Fe 16O | 71.913         | 682.496 |                          |                          |                          |  |
