# Supplementary material for: Dynamic implantation – an improved approach for a large area SIMS measurement
Source: Royal Society of Chemistry journal article supplement (doi:10.1039/d2ja00190j), 2023-01-01
Supplement: d2ja00190j6.pdf [file d2ja00190j6.pdf]

## Dynamic implantation - An improved approach for a large area SIMS measurement

Carmen Höschen,<sup>\*a</sup> Johann Lugmeier<sup>a</sup>

<sup>a</sup>Technical University of Munich, Department of Life Science Systems, TUM School of Life Sciences, Soil Science, Emil-Ramann-Straße 2, 85354 Freising-Weihenstephan, Germany.

\*E-mail: [carmen.hoeschen@tum.de](mailto:carmen.hoeschen@tum.de); Tel:+49 8161 71 3476

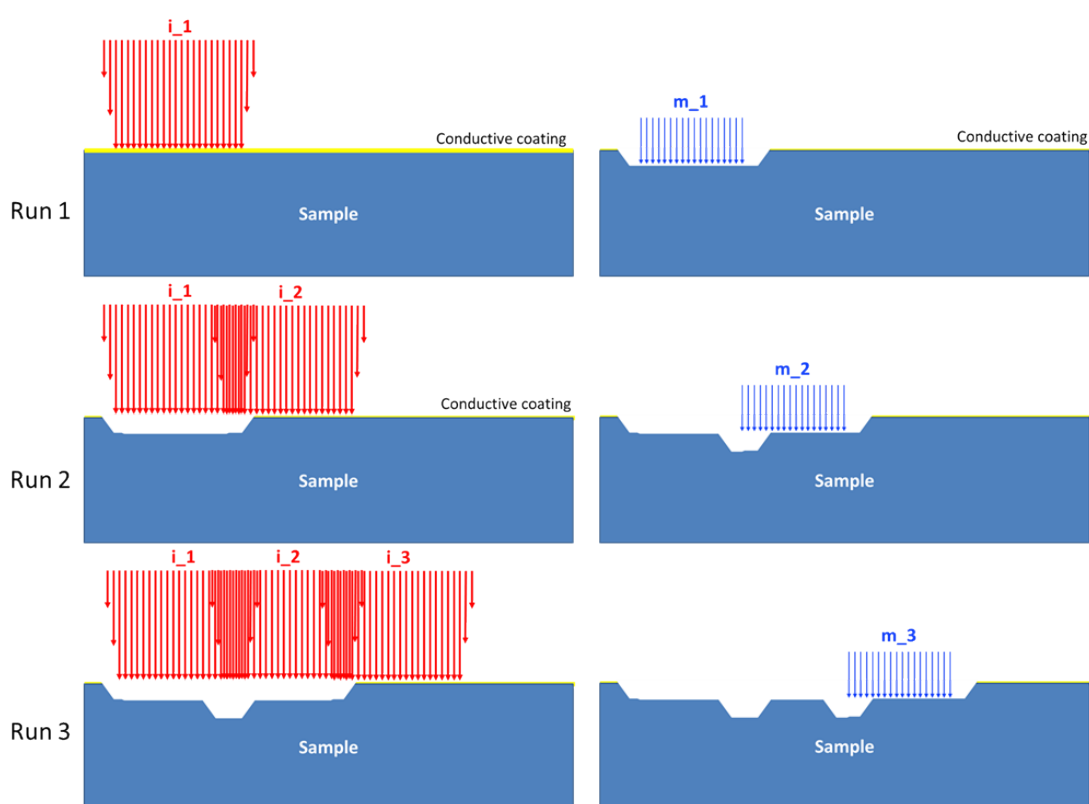

Fig. S1 Schematics illustrating the artifacts introduced by the traditional pre-sputtering/implantation of single spots in a row of measurements as line scan. Red colored arrows indicate the Cs dose entering the sample due to pre-sputtering at successive implantation steps ( $i_i$ ). The much lower Cs dose impacting the sample during the measurement ( $m_i$ ) is indicated by the blue arrows. Crater edge effects must be avoided by pre-sputtering area larger than the measurement size. At overlapping regions the different depths are measured due to the double implantation

Fig. S2 Exemplary graph showing the progression of the secondary ions escaping the sample surface. It is useful to determine the implantation fluence to reach a regime appropriate for performing the measurements. Once selected, the fluence should be kept constant for measuring the samples and the standards; a) depth profile of soil mineral matrix at a test position (10  $\mu\text{m}$  x 10  $\mu\text{m}$ , 12 pA). We choose a fluence of 60  $\text{C m}^{-2}$  (vertical green line), corresponding to a dose of  $3.7\text{E}+16$  Cs ions/ $\text{cm}^2$ , to perform our measurements on the embedded soil aggregate as at this fluence the  $^{16}\text{O}^-$  signal becomes sufficiently constant. b) and c) depth profiles on the araldite embedding media presenting impurities illustrated by their secondary ion counts (b) and the  $^{12}\text{C}^{14}\text{N}^-/^{12}\text{C}_2^-$  elemental ratio (c). The vertical green line shows favorable fluence (60  $\text{C m}^{-2}$ ) for measuring minor features like AIO which diminish with increasing fluence, while the vertical red line shows favorable fluence (150  $\text{C m}^{-2}$ ) when measuring at the steady state in the araldite matrix.

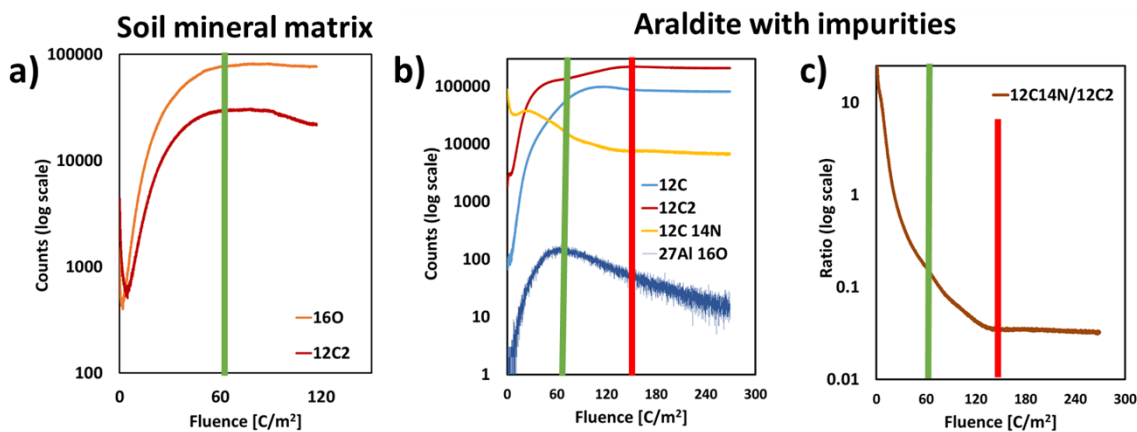

**Terms and formulas for calculating the parameters necessary to perform the dynamic implantation for any geometry of**

| Input                                               |                                   |              |             | Calculations      |                                  |               |                                           |                                       |                                        |
|-----------------------------------------------------|-----------------------------------|--------------|-------------|-------------------|----------------------------------|---------------|-------------------------------------------|---------------------------------------|----------------------------------------|
| <i>comment</i>                                      | <i>raster</i>                     | <i>I-Fco</i> | <i>time</i> | <i>time</i>       | <i>area</i>                      | <i>charge</i> | <i>fluence</i>                            | <i>dose</i>                           | <i>dose</i>                            |
|                                                     | <i>[<math>\mu\text{m}</math>]</i> | <i>[pA]</i>  | <i>[s]</i>  | <i>[hh:mm:ss]</i> | <i>[<math>\text{m}^2</math>]</i> | <i>[C]</i>    | <i>[<math>\text{C}/\text{m}^2</math>]</i> | <i>[ions/<math>\text{m}^2</math>]</i> | <i>[ions/<math>\text{cm}^2</math>]</i> |
| Fluence $1\text{C}/\text{m}^2$                      | 10                                | 10           | 10          | 00:00:10          | 1.0E-10                          | 1.0E-10       | 1.0                                       | 6.2E+18                               | 6.2E+14                                |
| Implantation check                                  | 10                                | 12           | 500         | 00:08:20          | 1.0E-10                          | 6.0E-09       | 60.0                                      | 3.7E+20                               | 3.7E+16                                |
| Implantation, high current, $60\text{C}/\text{m}^2$ | 50                                | 260          | 580         | 00:09:40          | 2.5E-09                          | 1.5E-07       | 60.3                                      | 3.8E+20                               | 3.8E+16                                |
| Measurement, 1 plane, 256 pixels                    | 30                                | 2            | 66          | 00:01:06          | 9.0E-10                          | 1.3E-10       | 0.1                                       | 9.1E+17                               | 9.1E+13                                |
| Measurement, 20 planes, 256 pixels                  | 30                                | 2            | 1312        | 00:21:52          | 9.0E-10                          | 2.6E-09       | 2.9                                       | 1.8E+19                               | 1.8E+15                                |
| Implantation steady state                           | 50                                | 260          | 1445        | 00:24:05          | 2.5E-09                          | 3.8E-07       | 150.3                                     | 9.4E+20                               | 9.4E+16                                |

Table 1 Determination of the fluence for different steps. In a first step (Implantation check) the fluence necessary to reach a regime appropriate for performing measurements is calculated based on the secondary ion evolution as shown in Fig. S2 ( $60\text{C m}^{-2}$ ). To avoid deterioration of the electron detectors (Electron Multipliers for NanoSIMS) the primary current (I-Fco) is limited and would be lower (e.g. 12 pA) than the high primary beam used for the dynamic implantation (e.g. 260 pA). To speed up, the raster size can be small (e.g.  $10\text{ }\mu\text{m}$ ). In a second step, the time necessary for implantation of the region to be measured at the found fluence ( $60\text{C m}^{-2}$ ) with high current (260 pA, while protecting the detectors) is determined (580 s). Furthermore, the fluence during the measurement is calculated. For example, during one plane of a measurement  $30\text{ }\mu\text{m} \times 30\text{ }\mu\text{m}$  consisting e.g. of 256 pixels at a dwell time of 1ms/pixel a dose of  $0.1\text{C m}^{-2}$  Cs ions enter the surface. More planes can be recorded according to statistical requirements for the precision of the measurement (e.g. 20 planes), while the fluence accumulates. To perform an implantation of an area of  $50\text{ }\mu\text{m} \times 50\text{ }\mu\text{m}$  in steady state ( $150\text{C m}^{-2}$ ) with a high current of 260 pA, about 24 minutes are necessary.

**analysis:**

m\_x\_start = x coordinate of the first measurement [ $\mu\text{m}$ ]  
 m\_y\_start = y coordinate of the first measurement [ $\mu\text{m}$ ]  
 m\_x\_stop = x coordinate of the last measurement [ $\mu\text{m}$ ]  
 m\_y\_stop = y coordinate of the first measurement [ $\mu\text{m}$ ]  
 m\_x\_center = x coordinate of the center of the measured area [ $\mu\text{m}$ ]  
 m\_y\_center = y coordinate of the center of the measured area [ $\mu\text{m}$ ]  
 m\_scan = scanning size (raster) of one single measurement [ $\mu\text{m}$ ]  
 m\_x\_n = number of measurements in x direction (= 1 for line scan in y)  
 m\_y\_n = number of measurements in y direction (= 1 for line scan in x)

i\_x\_start = x coordinate of the starting position for implantation [ $\mu\text{m}$ ]  
 i\_y\_start = y coordinate of the starting position for implantation [ $\mu\text{m}$ ]  
 i\_x\_stop = x coordinate of the end position for implantation [ $\mu\text{m}$ ]  
 i\_y\_stop = y coordinate of the end position for implantation [ $\mu\text{m}$ ]  
 i\_x\_step = step width during implantation in x direction [ $\mu\text{m}$ ], "+" is up, "-" is down  
 i\_y\_step = step width during implantation in y direction [ $\mu\text{m}$ ], "+" is right, "-" is left  
 i\_x\_nsteps = number of steps in x direction during implantation

$i\_y\_nsteps$  = number of steps in y direction during implantation  
 $i\_nsteps$  = number of total steps during implantation (for area scan)  
 $i\_scan$  = scanning size during implantation [ $\mu\text{m}$ ]  
 $i\_pixel$  = number of pixels for implantation (e.g. 64, 128 or 256), we recommend 64 when working with high current settings  
 $i\_pixel\_width$  = pixel size during the implantation  
 $i\_current$  = current of primary beam during implantation [pA]  
 $i\_fluence$  = fluence to be reached through implantation [ $\text{C}/\text{m}^2$ ] or [ $\text{pC}/\mu\text{m}^2$ ],  $1 \text{ pC}/\mu\text{m}^2 = 1 \text{ C}/\text{m}^2$   
 $i\_scan\_area$  = area of an implantation step with the  $i\_scan$  size [ $\mu\text{m}^2$ ]

$t\_scan\_area$  = time we need to reach the desired fluence in case we stay all the time at one spot with a given  $i\_scan$   
 $t\_step$  = time for one implantation step  
 $t\_tot$  = total time for implantation without software overhead  
 $t\_dwell$  = dwell time per pixel

#### Calculations formulas:

$m\_x\_stop$  [ $\mu\text{m}$ ] =  $m\_x\_start + ((m\_x\_n - 1) * m\_scan)$   
 $m\_y\_stop$  [ $\mu\text{m}$ ] =  $m\_y\_start + ((m\_y\_n - 1) * m\_scan)$   
 $m\_x\_center$  [ $\mu\text{m}$ ] =  $(m\_x\_start + m\_x\_stop) / 2$   
 $m\_y\_center$  [ $\mu\text{m}$ ] =  $(m\_y\_start + m\_y\_stop) / 2$   
 $i\_x\_start$  [ $\mu\text{m}$ ] =  $m\_x\_start - m\_scan / 2 - i\_scan$   
 $i\_y\_start$  [ $\mu\text{m}$ ] =  $m\_y\_start - m\_scan / 2 - i\_scan$   
 $i\_x\_stop$  [ $\mu\text{m}$ ] =  $m\_x\_stop + m\_scan / 2 + i\_scan$   
 $i\_y\_stop$  [ $\mu\text{m}$ ] =  $m\_y\_stop + m\_scan / 2 + i\_scan$   
 $i\_x\_nsteps$  =  $(i\_x\_stop - i\_x\_start) / i\_x\_step$   
 $i\_y\_nsteps$  =  $(i\_y\_stop - i\_y\_start) / i\_y\_step$   
 $i\_scan\_area$  [ $\mu\text{m}^2$ ] =  $i\_scan$  [ $\mu\text{m}$ ] \*  $i\_scan$  [ $\mu\text{m}$ ]  
 $i\_pixel\_width$  [nm] =  $i\_scan$  [nm] /  $i\_pixel$   
 $t\_scan\_area$  [s] =  $(i\_fluence * i\_scan\_area) / i\_current$   
 $t\_tot$  [s] =  $i\_nsteps * t\_step$   
 $t\_dwell$  [ $\mu\text{s}$ ] =  $t\_step$  [ $\mu\text{s}$ ] /  $i\_pixel^2$

charge [pC] =  $I$  [pA] \* time [s]; charge [C] =  $I$  [A] \* time [s]  
 fluence [ $\text{pC}/\mu\text{m}^2$ ] = charge [pC] / area =  $(I$  [pA] \* time [s]) /  $i\_scan$  [ $\mu\text{m}$ ]<sup>2</sup>  
 fluence [ $\text{C}/\text{m}^2$ ] = fluence [ $\text{pC}/\mu\text{m}^2$ ] =  $(I$  [A] \* time [s]) /  $i\_scan$  [m]<sup>2</sup>  
 dose [ions/ $\text{m}^2$ ] = fluence [ $\text{C}/\text{m}^2$ ] /  $e$ ;  $e = 1.6 \cdot 10^{-19}$  C

#### -for line scan:

$t\_step$  [s] =  $t\_scan\_area / (i\_scan / i\_x/y\_step)$   
*line scan Y:*  $i\_x\_start = m\_x\_start = m\_x\_center = i\_x\_stop = m\_x\_stop$   
*line scan X:*  $i\_y\_start = m\_y\_start = m\_y\_center = i\_y\_stop = m\_y\_stop$

#### -for area scan:

$i\_nsteps$  =  $i\_x\_nsteps * i\_y\_nsteps$   
 $i\_x\_step = i\_y\_step = i\_step$   
 $t\_step$  [s] =  $t\_scan\_area / (i\_scan / i\_step)^2$

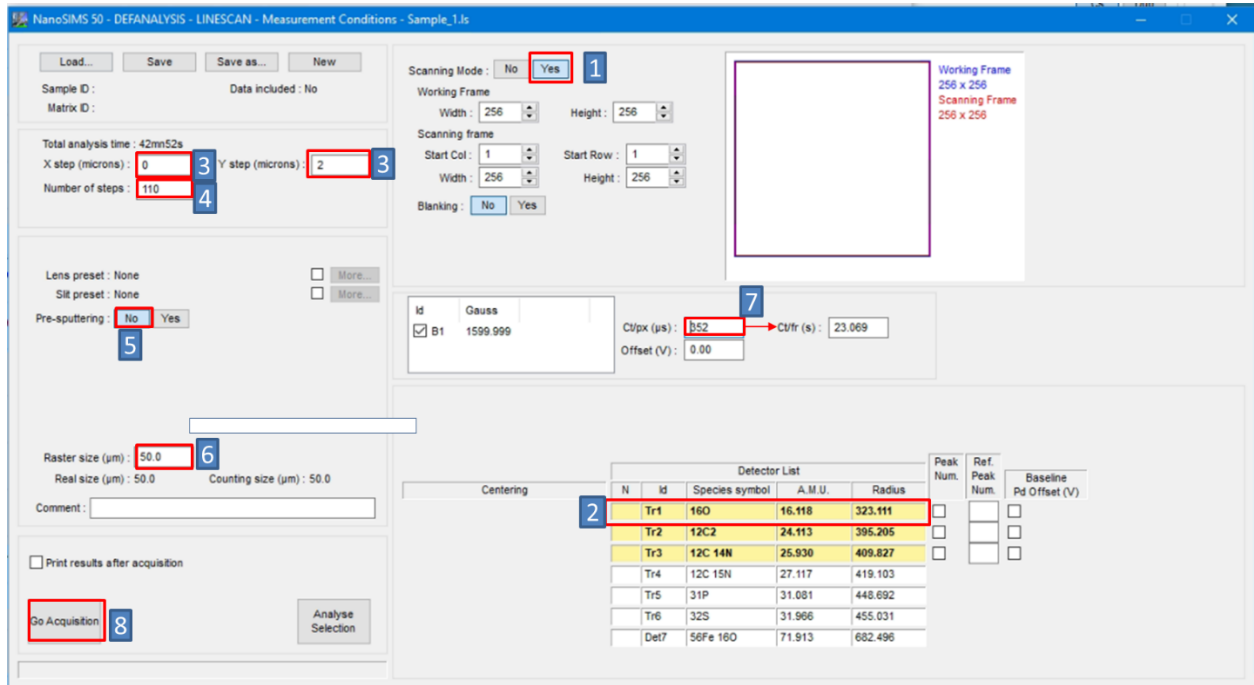

Fig. S3 Screenshot showing the step by step implementation of the line scan dynamic implantation in Cameca NanoSIMS Software

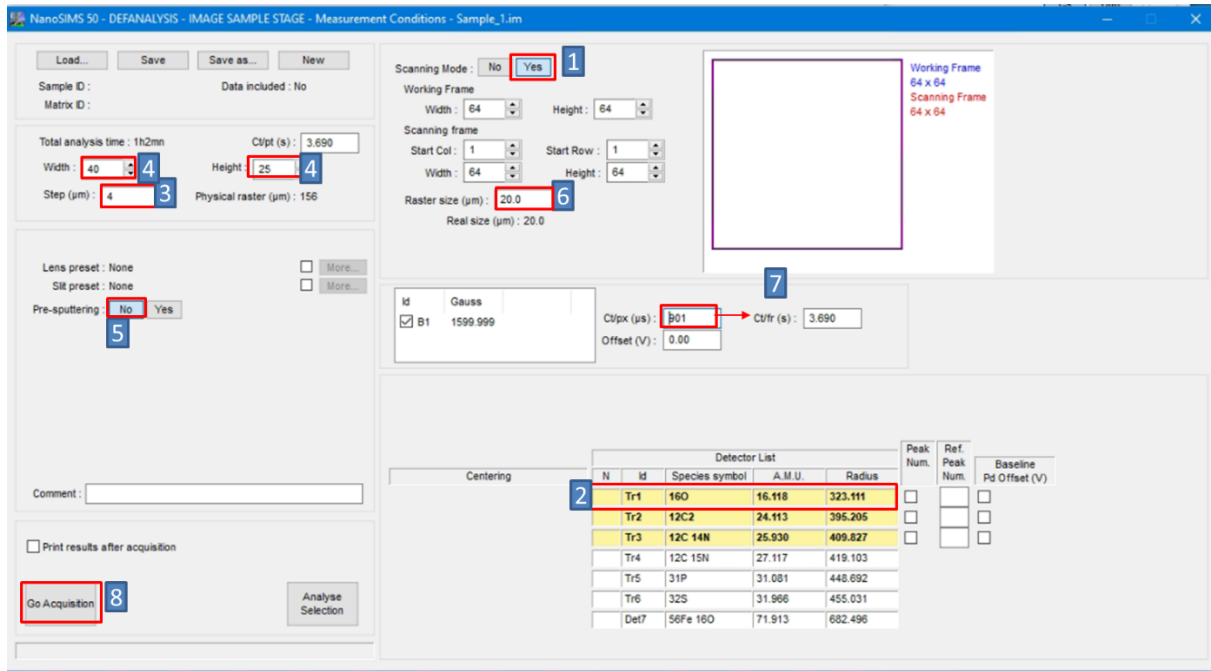

Fig. S4 Screenshot showing the step by step implementation of the area scan dynamic implantation in Cameca NanoSIMS Software

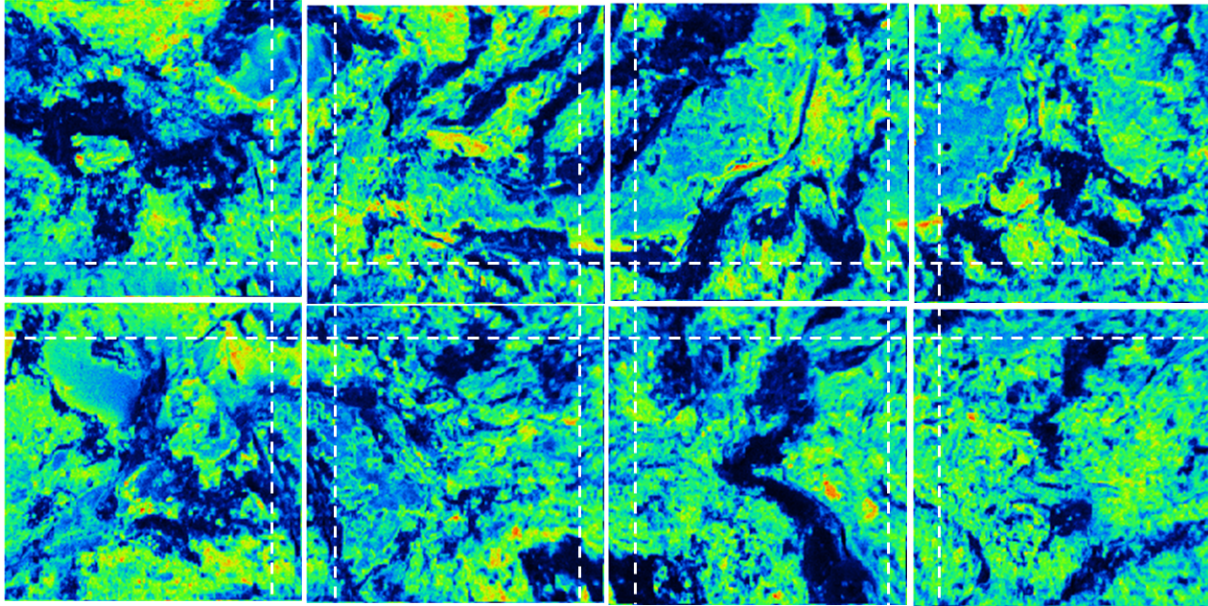

Fig. S5 NanoSIMS images ( $^{16}\text{O}^-$ ) of the area dynamically implanted (the same area shown in Fig. 4b for  $^{12}\text{C}_2^-$ ) consisting of  $4 \times 2$  measurements of  $30 \mu\text{m} \times 30 \mu\text{m}$  size performed with an overlap of  $3 \mu\text{m}$ , indicated by the white dashed lines. Due to the homogeneous dynamic implantation of the large area done previously to the measurements ( $60 \text{ C m}^{-2}$ ), at the zones twice measured with a low surplus dose of  $2.9 \text{ C m}^{-2}$ , no differences in the ion yield are visible. This would be different using classical implantation, when the overlap zones suffer a double pre-sputtering and so a surplus dose of  $(60+2.9) \text{ C m}^{-2}$ . Using the overlap, these measurements can be assembled as a mosaic without artefacts.
