# Supplementary material for: Dynamic implantation – an improved approach for a large area SIMS measurement
Source: Royal Society of Chemistry journal article supplement (doi:10.1039/d2ja00190j), 2023-01-01
Supplement: d2ja00190j7.pdf [file d2ja00190j7.pdf]

Electronic Supplementary Material (ESI) for Journal of Analytical Atomic Spectrometry.  
This journal is © The Royal Society of Chemistry 2023

| Input                                        |               |              |             | Calculations      |                        |               |                          |                             |                              |
|----------------------------------------------|---------------|--------------|-------------|-------------------|------------------------|---------------|--------------------------|-----------------------------|------------------------------|
| <i>comment</i>                               | <i>raster</i> | <i>I-Fco</i> | <i>time</i> | <i>time</i>       | <i>area</i>            | <i>charge</i> | <i>fluence</i>           | <i>dose</i>                 | <i>dose</i>                  |
|                                              | <i>[μm]</i>   | <i>[pA]</i>  | <i>[s]</i>  | <i>[hh:mm:ss]</i> | <i>[m<sup>2</sup>]</i> | <i>[C]</i>    | <i>[C/m<sup>2</sup>]</i> | <i>[ions/m<sup>2</sup>]</i> | <i>[ions/cm<sup>2</sup>]</i> |
| Fluence 1C/m <sup>2</sup>                    | 10            | 10           | 10          | 00:00:10          | 1.0E-10                | 1.0E-10       | 1.0                      | 6.2E+18                     | 6.2E+14                      |
| Implantation check                           | 10            | 12           | 500         | 00:08:20          | 1.0E-10                | 6.0E-09       | 60.0                     | 3.7E+20                     | 3.7E+16                      |
| Implantion, high current, 60C/m <sup>2</sup> | 50            | 260          | 580         | 00:09:40          | 2.5E-09                | 1.5E-07       | 60.3                     | 3.8E+20                     | 3.8E+16                      |
| Measurement, 1 plane, 256 pixels             | 30            | 2            | 66          | 00:01:06          | 9.0E-10                | 1.3E-10       | 0.15                     | 9.1E+17                     | 9.1E+13                      |
| Measurement, 20 planes, 256 pixels           | 30            | 2            | 1312        | 00:21:52          | 9.0E-10                | 2.6E-09       | 2.9                      | 1.8E+19                     | 1.8E+15                      |
| Implantation steady state                    | 50            | 260          | 1445        | 00:24:05          | 2.5E-09                | 3.8E-07       | 150.3                    | 9.4E+20                     | 9.4E+16                      |
