# Supplementary figures and images for: Dynamic implantation – an improved approach for a large area SIMS measurement
Source: Royal Society of Chemistry journal article supplement (doi:10.1039/d2ja00190j), 2023-01-01

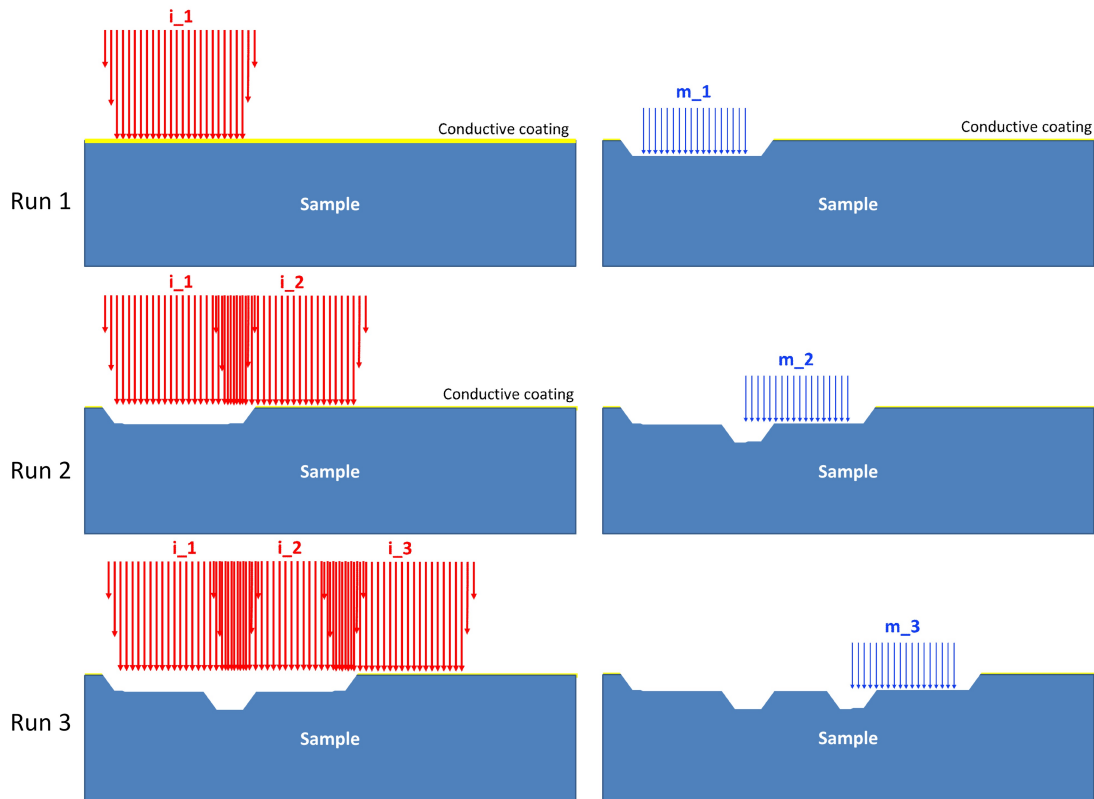

Supplement: d2ja00190j1.pdf [file d2ja00190j1.pdf]

**a) Soil mineral matrix**

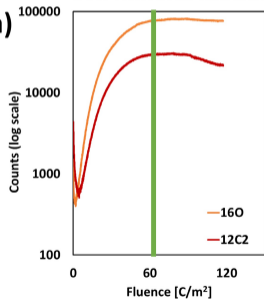

**b) Araldite with impurities**

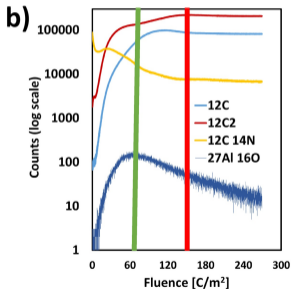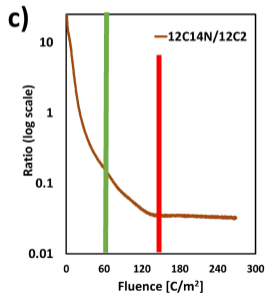

Supplement: d2ja00190j2.pdf [file d2ja00190j2.pdf]

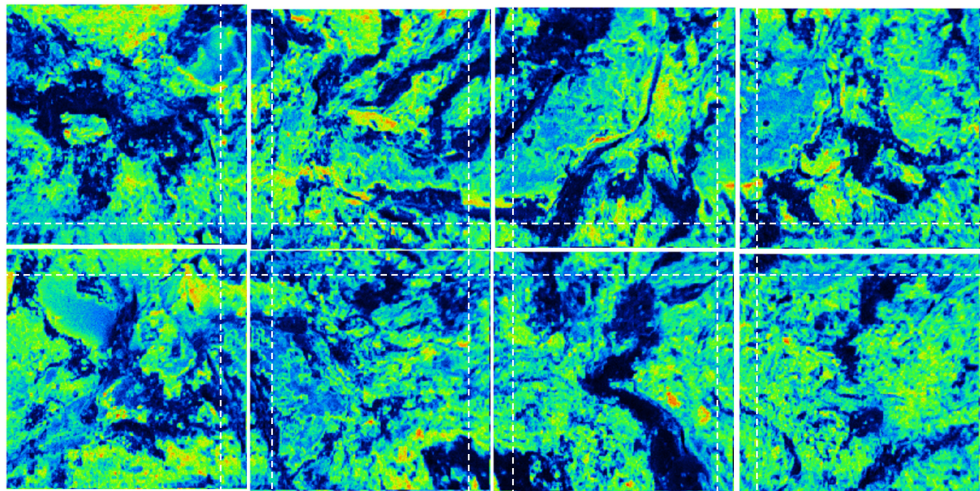

Supplement: d2ja00190j5.pdf [file d2ja00190j5.pdf]
